# Supplementary material
Source: MDPI journal article supplement (https://www.mdpi.com/2075-163X/4/2/503)
Supplement: s1 [file s1]

## Sheet: U-Pb Data Table
	Concentration (ppm)		Ratios									Age (Ma)
Sample and analysis code	U		Th/U	207Pb/235U	Err 2SE abs	206Pb/238U	Err 2SE abs	Rho	207Pb/206Pb	Err 2SE abs		207Pb/235U	Err 2SE abs	206Pb/238U	Err 2SE abs	207Pb/206Pb	Err 2SE abs		% Discordant
Penglai-CA_1	27.1		0.481696	0.004	0.012	0.0005	0.0002	0.26618	-	-	-	-	-	3.2	1.3	-	-		-
Penglai-CA_2	24.53		0.511771	0.012	0.012	0.00069	0.00022	0.18676	-	-	-	-	-	4.4	1.4	-	-		-
Penglai-CA_3	28.07		0.518135	0.003	0.012	0.00071	0.00026	0.0071963	-	-	-	-	-	4.5	1.6	-	-		-
Penglai-CA_4	27.46		0.506073	0.012	0.013	0.00056	0.00019	0.098144	-	-	-	-	-	3.6	1.2	-	-		-
Penglai-CA_5	18.97		0.380807	0.011	0.017	0.00068	0.00039	0.0062363	-	-	-	-	-	4.4	2.5	-	-		-
Penglai-CA_6	97.7		0.729395	0.0046	0.0065	0.0006	0.00012	0.18982	-	-	-	-	-	3.85	0.77	-	-		-
Penglai-CA_7	117.2		0.791766	0.0031	0.0041	0.00069	0.00011	0.31168	-	-	-	-	-	4.43	0.72	-	-		-
Penglai-CA_8	154.6		0.84674	0.0033	0.0044	0.00068	0.00011	0.3667	-	-	-	-	-	4.41	0.71	-	-		-
Penglai-CA_9	130.5		0.850196	0.0031	0.0027	0.000688	7.3e-05	0.058509	-	-	-	-	-	4.43	0.47	-	-		-
Penglai-CA_10	47.85		0.625782	0.0012	0.0071	0.0006	0.00018	0.55663	-	-	-	-	-	3.9	1.1	-	-		-
Penglai-CA_11	43.3		0.611995	0.013	0.016	0.00068	0.00026	0.186	-	-	-	-	-	4.4	1.7	-	-		-
Penglai-CA_12	49.3		0.613874	0.0021	0.0065	0.00068	0.00012	0.080964	-	-	-	-	-	4.4	0.78	-	-		-
Penglai-CA_13	49.16		0.601323	0.0024	0.0069	0.00071	0.00016	0.11246	-	-	-	-	-	4.6	1.1	-	-		-
Penglai-CA_14	16.25		0.438596	0.001	0.013	0.00069	0.00022	0.056019	-	-	-	-	-	4.5	1.4	-	-		-
Penglai-CA_15	28.66		0.458505	0.001	0.012	0.00069	0.00029	0.22505	-	-	-	-	-	4.5	1.9	-	-		-
Penglai-CA_16	55.2		0.43573	0.008	0.013	0.00059	0.0002	0.10719	-	-	-	-	-	3.8	1.3	-	-		-
Penglai-CA_17	57		0.664011	0.0028	0.0034	0.00069	0.00012	0.013474	-	-	-	-	-	4.43	0.78	-	-		-
Penglai-CA_18	17.11		0.439947	0.001	0.01	0.00079	0.00019	0.1552	-	-	-	-	-	5.1	1.2	-	-		-
Penglai-CA_19	31.1		0.455789	0.005	0.01	0.0007	0.00021	0.11021	-	-	-	-	-	4.5	1.4	-	-		-
Penglai-CA_20	57.2		0.66357	0.0046	0.0039	0.00065	0.00011	0.13481	-	-	-	-	-	4.21	0.73	-	-		-
TSUPB021_6	128.2		0.905	22.38	0.42	0.595	0.012	0.86404	0.2673	0.0025		3200	18	3010	47	3297.3	7.1		8.71319
TSUPB021_7	138		0.97	25.39	0.36	0.6721	0.0095	0.76352	0.2699	0.002		3323	14	3314	37	3305.4	7.3		-0.26018
TSUPB021_8	143		0.5632	24.27	0.26	0.6565	0.0071	0.75704	0.2626	0.0019		3279	10	3253	28	3267.8	7.5		0.452904
TSUPB021_10	243		0.872	24.24	0.18	0.6554	0.0072	0.15078	0.2621	0.004		3278.2	7.1	3249	28	3261	11		0.367985
TSUPB021_12	294.7		0.4416	23.73	0.3	0.6367	0.0076	0.73915	0.2644	0.0028		3257	12	3176	30	3281	7.3		3.20024
TSUPB021_13	261.7		0.3887	23.62	0.27	0.6347	0.0077	0.324	0.2664	0.0039		3253	11	3168	31	3287	11		3.62032
TSUPB021_14	180.5		0.4783	23.87	0.33	0.6466	0.009	0.66447	0.266	0.0032		3265	13	3214	35	3283	12		2.10174
TSUPB021_16	1241		0.5879	17.8	0.34	0.5754	0.0079	0.68441	0.2221	0.0036		2984	16	2930	32	2997	16		2.23557
TSUPB021_18	1269		0.8098	16.2	0.31	0.4471	0.0076	0.89418	0.257	0.0016		2888	18	2382	34	3230.3	5.8		26.2607
TSUPB021_19	524		1.608	23.76	0.41	0.638	0.011	0.86681	0.2671	0.0025		3263	18	3181	42	3289.9	8.7		3.31013
TSUPB021_25	413.9		0.572	22.15	0.24	0.599	0.0059	0.88818	0.2641	0.0013		3189	11	3028	24	3271.8	4.2		7.45156
TSUPB021_26	207.7		0.82	17.64	0.4	0.5692	0.0093	0.44789	0.2214	0.0038		2970	22	2904	38	2994	19		3.00601
TSUPB021_27	277.7		1.345	24.35	0.19	0.6639	0.0052	0.51169	0.263	0.0021		3282.4	7.6	3282	20	3270.6	5.7		-0.34856
TSUPB021_28	61.3		1.379	23.7	0.21	0.6562	0.005	0.35855	0.2624	0.0022		3257.1	9	3252	19	3261.2	8.2		0.282105
TSUPB021_28	1013		0.3602	16.64	0.37	0.4335	0.0066	0.89836	0.2748	0.0028		2915	22	2320	30	3333	14		30.393
TSUPB021_29	709		1.58	8.21	0.24	0.2937	0.0074	0.96957	0.2026	0.0015		2250	25	1659	37	2846.7	8.1		41.722
TSUPB021_30	39.3		1.392	23.01	0.36	0.6491	0.0076	0.7255	0.2573	0.0031		3226	15	3224	30	3232	14		0.247525
TSUPB021_31	182.3		1.086	17.78	0.19	0.5863	0.0064	0.63878	0.2205	0.0022		2978	10	2974	26	2983	11		0.30171
TSUPB021_31	1242		0.5946	23.33	0.24	0.6277	0.0062	0.59641	0.2666	0.0026		3240.6	9.9	3140	24	3286	10		4.44309
TSUPB021_32	336.8		1.308	23.33	0.17	0.6528	0.0044	0.60015	0.2604	0.0017		3241.6	7	3239	17	3251	7.1		0.369117
TSUPB021_32	546.2		0.5884	21.4	0.31	0.5645	0.0055	0.70625	0.2748	0.0025		3160	14	2885	23	3338	10		13.571
TSUPB021_33	4510		0.3721	23.85	0.22	0.6499	0.0049	0.4588	0.2642	0.0028		3265	10	3228	19	3276.2	9.3		1.47122
TSUPB021_33	407		1.397	20.83	0.15	0.5795	0.005	0.74415	0.2618	0.0013		3130.2	6.9	2946	20	3260.1	5.1		9.63467
TSUPB021_34	2300		1.131	23.62	0.58	0.653	0.012	0.77286	0.261	0.004		3251	24	3240	45	3254	16		0.43024
TSUPB021_35	386		2.2	15.02	0.28	0.4847	0.0083	0.92864	0.2253	0.0015		2817	18	2547	36	3022.2	6.5		15.7236
TSUPB021_35	7310		0.9448	13.65	0.1	0.4463	0.0028	0.66214	0.2188	0.0015		2725.4	7	2379	12	2968.7	6.8		19.8639
TSUPB021_36	1655		0.623	24.4	0.32	0.6629	0.0065	0.84269	0.2632	0.003		3284	13	3278	25	3275.1	8.2		-0.0885469
TSUPB021_36	141		1.746	16.63	0.25	0.472	0.0072	0.78984	0.2579	0.0024		2915	15	2492	32	3227.8	9.3		22.7957
TSUPB021_37	210.6		1.364	18.25	0.25	0.5926	0.0064	0.81536	0.2239	0.0017		3002	13	2999	26	3012.4	6.4		0.444828
TSUPB021_37	1002		1.021	18.56	0.19	0.5933	0.0044	0.55642	0.2291	0.0017		3018.9	9.9	3002	18	3050.3	8		1.58345
TSUPB021_38	391		2.343	23.52	0.12	0.6541	0.0046	0.83825	0.2606	0.0013		3248.5	4.9	3244	18	3250.8	5.8		0.209179
TSUPB021_39	330.9		0.9043	13.43	0.18	0.4555	0.0037	0.50396	0.2115	0.0022		2710	13	2420	16	2924	14		17.2367
TSUPB021_40	307		1.463	15.29	0.29	0.5216	0.0097	0.94267	0.2122	0.0016		2833	18	2706	41	2907	16		6.91434
TSUPB021_41	437.2		0.64	11.35	0.21	0.399	0.0075	0.86277	0.2065	0.0019		2551	17	2164	34	2881	13		24.8872
TSUPB021_42	405		0.535	13.75	0.43	0.434	0.01	0.79524	0.2282	0.0077		2731	29	2323	45	3033	50		23.4092
TSUPB021_43	131.7		1.399	17.94	0.28	0.5904	0.008	0.43589	0.2194	0.003		2986	15	2991	32	2972	12		-0.6393
TSUPB021_49	310.4		1.018	23.37	0.23	0.6526	0.0069	0.36864	0.2593	0.0025		3242.4	9.5	3238	27	3241.9	7		0.1203
TSUPB021_51	102.7		0.965	23.96	0.36	0.6601	0.0079	0.50625	0.2629	0.0041		3267	15	3267	31	3264	13		-0.0919118
TSUPB021_52	426		8.7	16.15	0.6	0.503	0.018	0.94993	0.2326	0.0026		2883	36	2624	79	3060	12		14.2484
TSUPB021_53	274.3		1.036	25.15	0.11	0.6731	0.0034	0.45389	0.2707	0.0013		3313.9	4.4	3318	13	3310.1	5.8		-0.238663
TSUPB021_54	140.5		1.687	24.44	0.28	0.6649	0.0097	0.66978	0.2672	0.0027		3286	11	3286	38	3285.7	9		-0.00913047
TSUPB021_55	146.3		1.694	23.07	0.2	0.6274	0.0057	0.80939	0.2665	0.0015		3231	8.6	3139	22	3286.5	4.9		4.48806
TSUPB021_56	238.3		2.525	23.7	0.15	0.6575	0.004	0.55661	0.2604	0.0017		3255.8	6.2	3257	16	3248.8	7		-0.252401
TSUPB021_57	232.3		0.6751	21.18	0.18	0.5904	0.0047	0.49116	0.2591	0.002		3146.2	8.4	2991	19	3240.3	7		7.69373
TSUPB021_58	629		1.455	11.78	0.24	0.3176	0.0052	0.94239	0.2447	0.0015		2585	19	1777	26	3149.9	6.5		43.5855
TSUPB021_59	155.6		1.665	23.79	0.37	0.658	0.014	0.52137	0.2624	0.0042		3260	15	3259	56	3249	20		-0.307787
TSUPB021_60	202.7		0.752	23.59	0.31	0.6544	0.0081	0.88345	0.2624	0.0016		3253	13	3244	32	3258.8	7.9		0.454155
TSUPB021_62	820		1.099	13.88	0.23	0.4684	0.0068	0.93374	0.2142	0.001		2740	15	2476	30	2935.8	5		15.6618
TSUPB021_63	169.5		1.5101	23.57	0.17	0.6559	0.0043	0.51671	0.2613	0.0019		3250.3	6.8	3251	17	3253.8	6		0.0860532
TSUPB021_65	219.8		1.282	23.56	0.17	0.6565	0.0051	0.62617	0.2605	0.0018		3250.2	6.9	3253	20	3250.8	7.5		-0.0676756
TSUPB021_72	75.46		3.87	19.68	0.3	0.5671	0.0079	0.48789	0.2495	0.0039		3079	14	2895	33	3187	13		9.16222
TSUPB021_73	132		1.199	18.9	0.22	0.6015	0.0048	0.28082	0.2251	0.0033		3037	11	3036	19	3019	10		-0.5631
TSUPB021_74	481		0.984	15.63	0.46	0.444	0.012	0.98569	0.2549	0.0015		2850	27	2368	53	3217.1	7.6		26.3933
TSUPB021_75	435		1.53	11.49	0.49	0.381	0.014	0.97482	0.2184	0.0022		2553	39	2077	67	2969	15		30.0438
TSUPB021_76	175.1		1.379	23.71	0.17	0.6564	0.005	0.63099	0.2611	0.0016		3256.4	6.8	3253	19	3249.6	4.7		-0.104628
TSUPB021_78	399		1.566	12.66	0.38	0.411	0.01	0.95215	0.2228	0.002		2653	28	2220	46	2996.8	9.1		25.921
TSUPB021_79	209.9		1.06	24.16	0.29	0.6611	0.0081	0.55698	0.2641	0.0034		3274	12	3271	31	3269	10		-0.0611808
TSUPB021_80	339		1.817	19.17	0.17	0.5372	0.0049	0.78693	0.2585	0.0013		3049.8	8.8	2771	20	3238	5.8		14.4225
TSUPB021_81	31.9		2.424	23.03	0.47	0.649	0.011	0.46633	0.257	0.0044		3226	20	3225	44	3224	16		-0.0310174
TSUPB021_82	276.1		0.6285	17.8	0.14	0.5878	0.0042	0.42557	0.2196	0.0019		2978.9	7.4	2980	17	2974.3	7.5		-0.191642
TSUPB021_83	534		1.573	12.52	0.24	0.3195	0.0056	0.96478	0.2582	0.0021		2643	17	1787	27	3233	10		44.7263
TSUPB021_85	618		1.62	9.28	0.15	0.316	0.005	0.81405	0.212	0.0019		2365	15	1770	25	2925.9	9.3		39.5058
TSUPB021_86	754		1.924	9.6	0.33	0.322	0.01	0.89202	0.2133	0.0026		2395	31	1800	49	2937	14		38.713
TSUPB021_93	112		1.024	24.46	0.19	0.6662	0.0067	0.57624	0.2649	0.0022		3286.8	7.6	3291	26	3276.2	8.3		-0.451743
TSUPB021_94	411		1.713	17.03	0.25	0.5639	0.0057	0.72275	0.2168	0.0026		2936	14	2883	24	2955.8	7.7		2.46295
TSUPB021_96	306.7		1.265	20.92	0.26	0.5834	0.0067	0.70189	0.2599	0.0022		3134	12	2962	27	3243	6.9		8.66482
TSUPB021_97	261.4		16.9	20.68	0.13	0.616	0.0035	0.28745	0.2424	0.0015		3123.6	6.1	3094	14	3137	7		1.37074
TSUPB021_98	355.9		2.1	20.88	0.15	0.5832	0.0048	0.52542	0.2586	0.0018		3132.6	6.8	2964	19	3237.5	8.4		8.44788
TSUPB021_99	85.3		0.669	23.99	0.27	0.6567	0.0079	0.23607	0.2625	0.0035		3268	11	3254	31	3264	14		0.306373
TSUPB021_100	139.9		3.015	23.17	0.22	0.6523	0.006	0.48	0.2576	0.0026		3233.8	9.3	3237	23	3228.3	9.2		-0.269492
TSUPB021_101	661		0.988	10.58	0.22	0.2987	0.0041	0.91108	0.2542	0.0021		2484	19	1685	20	3216	11		47.6057
TSUPB021_102	390		1.368	16.08	0.12	0.5309	0.0044	0.6592	0.2189	0.0013		2882.3	6.8	2745	18	2972.6	7.3		7.6566
TSUPB021_103	152.2		1.451	17.55	0.2	0.5841	0.0068	0.47943	0.217	0.0024		2965	11	2965	28	2960	12		-0.168919
TSUPB021_105	257.8		1.1522	17.44	0.2	0.5827	0.0081	0.5288	0.2184	0.0025		2959	11	2959	33	2961	11		0.0675447
TSUPB021_106	618		0.803	10.1	0.2	0.3496	0.0061	0.94132	0.2082	0.0015		2445	18	1937	28	2894.9	8.1		33.0892
TSUPB021_108	74.8		2.413	22.71	0.2	0.6474	0.0052	0.31014	0.2536	0.0024		3215.4	8.4	3218	20	3208.7	8.3		-0.289837
TSUPB021_109	198.8		4.799	23.52	0.19	0.6563	0.0044	0.53975	0.2586	0.0017		3248.3	7.7	3253	17	3235.8	6.8		-0.531553
TSUPB021_110	340		6.96	15.76	0.4	0.485	0.012	0.93007	0.2352	0.0022		2863	25	2548	51	3084	12		17.38
TSUPB021-CA_5	347		0.63857	22.62	0.15	0.6302	0.0044	0.63089	0.2613	0.0012		3210.5	6.7	3150	18	3254.7	7		3.13
TSUPB021-CA_6	227		0.665336	16.69	0.25	0.5585	0.0059	0.8984	0.2195	0.0013		2919	14	2860	25	2976.3	9.6		3.9
TSUPB021-CA_7	139.7		0.442282	23.68	0.24	0.6568	0.0062	0.54439	0.26	0.0022		3255.1	9.7	3254	24	3246	13		-0.26
TSUPB021-CA_8	272.1		0.763359	15.83	0.2	0.5233	0.0058	0.88878	0.2183	0.0012		2866	12	2713	25	2968.2	8.6		8.5
TSUPB021-CA_9	161.3		0.751315	25.21	0.23	0.6733	0.0057	0.57566	0.2721	0.002		3315.9	9	3318	22	3318	12		-0.1
TSUPB021-CA_10	193		0.946074	25.47	0.31	0.6779	0.0065	0.6289	0.2717	0.0024		3326	12	3336	25	3316	14		-0.3
TSUPB021-CA_11	70		1.04822	24.22	0.26	0.6631	0.0066	0.66449	0.267	0.002		3278.8	9.9	3279	25	3290	12		0.58
TSUPB021-CA_12	113.1		0.470367	23.27	0.17	0.6519	0.0045	0.4804	0.2617	0.0016		3237.9	7.2	3235	18	3256.5	9.4		0.6
TSUPB021-CA_18	232.3		0.222717	19.32	0.16	0.6139	0.0051	0.92201	0.2294	0.0012		3057.5	7.9	3085	20	3047.8	8.4		-1.02
TSUPB021-CA_19	202.9		0.691563	19.11	0.13	0.6046	0.0039	0.27923	0.2303	0.0017		3047.3	6.5	3048	16	3054	11		0.19
TSUPB021-CA_20	307.4		0.49505	22.6	0.35	0.645	0.012	0.90152	0.2573	0.0018		3209	15	3209	48	3230	11		0.9
TSUPB021-CA_21	271		0.455166	19.43	0.22	0.6072	0.0061	0.86113	0.2307	0.0014		3063	11	3058	25	3056.6	9.7		-0.19
TSUPB021-CA_22	182		0.615006	17.21	0.17	0.5803	0.005	0.71027	0.2168	0.0014		2946	9.5	2950	20	2957	10		0.26
TSUPB021-CA_23	172.6		1.08342	16.98	0.14	0.5578	0.0038	0.48173	0.2205	0.0015		2933.4	7.8	2857	16	2984	11		4.1
TSUPB021-CA_24	106.06		0.990099	24.35	0.21	0.6639	0.0077	0.39641	0.2645	0.0027		3282.1	8.4	3282	30	3273	16		0.2
TSUPB021-CA_29	250		0.859107	16.03	0.11	0.5471	0.0048	0.86849	0.2193	0.001		2878.5	6.6	2813	20	2975.2	7.4		5.55
TSUPB021-CA_30	218		0.84246	21.96	0.27	0.6378	0.008	0.31382	0.2707	0.0014		3181	12	3180	31	3309.7	8.2		4.1
TSUPB021-CA_31	230.7		1.02354	20.84	0.15	0.6253	0.0064	0.78166	0.2706	0.0016		3133.4	7.1	3130	25	3309.1	9.3		5.31
TSUPB021-CA_32	115.3		0.493097	23.87	0.27	0.66	0.011	0.6398	0.2662	0.0034		3263	11	3268	41	3283	20		0.4
TSUPB021-CA_33	359.4		1.12994	23.35	0.32	0.6527	0.0056	0.86853	0.2606	0.0014		3241	14	3238	22	3249.8	8.4		0.41
TSUPB021-CA_34	212.6		0.667111	17.72	0.14	0.586	0.0056	0.64818	0.2214	0.0017		2976.4	8.3	2973	23	2991	12		0.5
TSUPB021-CA_35	196		0.992063	16.68	0.21	0.5554	0.0085	0.88912	0.222	0.0012		2916	12	2847	35	2994.9	8.7		5.3
TSUPB021-CA_40	204.1		0.617665	22.32	0.23	0.6431	0.0067	0.80671	0.2603	0.0023		3197.5	9.8	3201	26	3248	14		1.8
TSUPB021-CA_41	328.8		0.338295	22.73	0.19	0.6349	0.0052	0.7566	0.26	0.0013		3215.1	8.1	3169	20	3246.7	7.9		2.39
TSUPB021-CA_42	148.2		0.77821	21.42	0.19	0.6128	0.0072	0.68728	0.2579	0.0021		3158.8	9	3080	29	3235	13		4.6
TSUPB021-CA_43	191.6		0.810373	23.19	0.17	0.6512	0.0049	0.98988	0.2587	0.0014		3234.5	6.9	3233	19	3238.7	8.8		0.09
TSUPB021-CA_44	259.7		0.683995	17.91	0.14	0.588	0.0049	0.67508	0.2207	0.0014		2984.6	7.4	2981	20	2985	10		-0.03
TSUPB021-CA_45	145.9		0.431965	19.23	0.14	0.6059	0.0044	0.41117	0.23	0.0018		3054.1	7.1	3053	18	3053	13		-0.15
TSUPB021-CA_46	310		1.12486	14.98	0.35	0.503	0.011	0.27524	0.2209	0.0016		2811	23	2626	48	2987	12		12.5
TSUPB021-CA_47	227.8		1.03734	24.18	0.15	0.6602	0.0043	0.57661	0.2655	0.0016		3275.7	6	3268	17	3279.2	9.6		0.36
TSUPB021-CA_48	499.7		0.371333	21.87	0.27	0.635	0.01	0.68084	0.255	0.0026		3178	12	3170	40	3216	16		1.7
TSUPB021-CA_49	180		0.319081	19.44	0.15	0.6062	0.0084	0.6549	0.2312	0.0023		3063.5	7.7	3054	34	3060	16		0.1
TSUPB021-CA_54	260.3		0.581058	17.72	0.16	0.591	0.011	0.45396	0.2234	0.0033		2974.6	8.9	2995	43	3005	24		0.7
TSUPB021-CA_55	266.3		0.547046	23.72	0.27	0.6571	0.0057	0.62021	0.2656	0.0023		3257	11	3256	22	3280	14		0.58
TSUPB021-CA_56	226		0.66313	17.74	0.38	0.587	0.015	0.88697	0.2177	0.0025		2974	21	2977	60	2963	18		-0.4
TSUPB021-CA_57	322.7		1.00503	17.23	0.18	0.5817	0.0051	0.53965	0.217	0.0017		2950.5	8.7	2955	21	2958	13		0.17
TSUPB021-CA_58	139		1.03734	23.08	0.73	0.648	0.023	0.98779	0.261	0.0024		3227	32	3218	92	3253	15		1
TSUPB021-CA_59	109.3		0.594177	23.48	0.25	0.6543	0.0068	0.60975	0.2608	0.002		3246	10	3245	26	3251	12		0.45
TSUPB021-CA_60	193.4		0.312891	23	0.23	0.6494	0.007	0.79814	0.259	0.0016		3226.8	9.9	3226	27	3241	10		0.46
TSUPB021-CA_61	310.8		0.979432	17.77	0.11	0.5789	0.0044	0.66556	0.2226	0.0011		2978.3	5.5	2947	19	2999.2	7.6		1.86
TSUPB021-CA_62	186.1		0.475511	23.66	0.27	0.6579	0.0082	0.72827	0.2573	0.0017		3254	11	3259	32	3230	10		-1.1
TSUPB021-CA_67	275.8		0.778816	23.85	0.15	0.6499	0.0039	0.36109	0.2643	0.0018		3262	6.3	3227	15	3272	11		1.2
TSUPB021-CA_68	425.5		0.629723	14.59	0.27	0.4815	0.0076	0.95902	0.219	0.0012		2787	17	2533	33	2972.8	9.1		14.8
TSUPB021-CA_69	177.2		0.651042	23.35	0.23	0.6524	0.0057	0.64913	0.2607	0.0021		3241.4	9.5	3237	22	3253	13		0.38
TSUPB021-CA_70	160		0.81103	23.9	0.21	0.6602	0.0069	0.65882	0.2618	0.0021		3263.9	8.6	3267	27	3259	12		-0.3
TSUPB021-CA_71	389.8		0.351494	21.09	0.2	0.5992	0.005	0.83984	0.2541	0.0012		3143.9	9.1	3026	20	3210.1	7.7		5.89
TSUPB021-CA_72	369		0.375094	20.52	0.32	0.5836	0.0072	0.94002	0.2532	0.0013		3115	15	2963	29	3204.5	7.9		7.5
TSUPB021-CA_73	361		0.234192	21.39	0.14	0.5912	0.0049	0.743	0.2615	0.0013		3156.4	6.3	2994	20	3256.6	8.3		8.2
TSUPB021-CA_74	263.5		0.616523	24.4	0.15	0.6649	0.0042	0.74268	0.2629	0.0015		3284.3	5.9	3286	16	3264	8.9		-0.5
TSUPB021-CA_75	263.3		0.625391	18.03	0.15	0.5901	0.0042	0.69938	0.2214	0.0011		2991.1	8	2992	16	2992.1	7.8		-0.07
TSUPB021-CA_80	99.9		0.673401	23.18	0.24	0.6412	0.0062	0.43832	0.2609	0.0023		3234	10	3193	24	3251	14		1.7
TSUPB021-CA_81	230.3		0.859845	17.88	0.14	0.5874	0.0055	0.60429	0.2226	0.0016		2983.3	7.7	2979	22	2999	12		0.55
TSUPB021-CA_82	253		0.87108	17.99	0.19	0.5874	0.0054	0.51948	0.2222	0.002		2989	10	2979	22	2996	14		0.4
TSUPB021-CA_83	97.7		0.806452	24.4	0.29	0.6651	0.0071	0.57346	0.2643	0.0023		3284	12	3286	27	3272	13		-0.5
TSUPB021-CA_84	122.68		0.935454	23.91	0.17	0.6528	0.0044	0.5439	0.2643	0.0016		3264.3	7	3239	17	3272.1	9.5		0.91
TSUPB021-CA_85	92.5		1.01937	24.37	0.18	0.665	0.011	0.52763	0.2627	0.0035		3283.3	7.4	3286	43	3263	21		-0.5
TSUPB021-CA_86	159.6		0.654879	24.25	0.24	0.6624	0.0063	0.85189	0.2649	0.0017		3278.1	9.7	3282	27	3275	10		-0.12
TSUPB021-CA_87	119.68		0.738552	24.23	0.2	0.6646	0.0064	0.62162	0.264	0.0019		3277.4	8.1	3284	25	3270	11		-0.7
TSUPB021-CA_88	133		0.692521	18.08	0.17	0.5907	0.0043	0.50844	0.2211	0.0017		2995	8.6	2992	18	2988	12		-0.07
TSUPB021-CA_89	193		1.08814	18.37	0.13	0.5966	0.0043	0.51571	0.2217	0.0016		3009.2	7	3016	17	2993	12		-0.87
TSUPB021-CA_94	288.7		0.623053	17.79	0.17	0.5867	0.0053	0.52413	0.2209	0.0018		2978.4	9.3	2976	21	2987	13		-0.1
TSUPB021-CA_95	148.3		0.87108	17.95	0.17	0.5847	0.0044	0.89779	0.2213	0.0012		2986.4	8.8	2967	18	2990.2	8.5		0.72
TSUPB021-CA_96	81.7		0.457875	23.95	0.28	0.6608	0.0072	0.43036	0.2599	0.0029		3266	11	3270	28	3249	16		-0.7
10/225_1	130.9		1.11857	0.835	0.02	0.07904	0.0009	0.593	0.0769	0.0016		615	11	490.4	5.4	1118.6	41.5082		56.1594
10/225_2	246.9		0.515517	0.5958	0.0081	0.07725	0.00093	0.77953	0.05605	0.0005		474.3	5.2	479.6	5.5	454.35	19.7992		-5.55748
10/225_3	518		0.558534	0.761	0.012	0.07725	0.0009	0.75199	0.07202	0.00088		574.2	7.2	479.6	5.4	986.506	24.8656		51.384
10/225_4	82.5		0.768049	0.637	0.014	0.0808	0.0011	0.61387	0.05792	0.00091		499.4	8.5	501.5	6.2	526.737	34.4402		4.79121
10/225_5	97.1		0.921659	0.7	0.011	0.0792	0.00087	0.60231	0.06431	0.00084		539.3	6.5	491.3	5.2	751.842	27.581		34.6538
10/225_6	56.4		1.06496	0.597	0.014	0.0782	0.0011	0.41229	0.056	0.0012		474.7	8.8	485.4	6.3	452.368	47.5769		-7.30191
10/225_7	434		0.843953	0.5983	0.0086	0.07757	0.00097	0.92221	0.0562	0.00031		475.8	5.5	481.5	5.8	460.278	12.2302		-4.6106
10/225_8	77.3		0.848896	0.636	0.013	0.0806	0.0011	0.50844	0.0575	0.001		499	7.8	500.1	6.6	510.762	38.2269		2.08745
10/225_9	837		0.998004	0.7093	0.0092	0.07086	0.00095	0.9469	0.07299	0.00034		544	5.5	441.3	5.7	1013.68	9.44032		56.4653
10/225_10	251.4		0.446429	0.5981	0.0092	0.07835	0.0008	0.82336	0.0555	0.00047		475.7	5.9	486.2	4.8	432.421	18.8674		-12.4367
10/225_11	256.4		0.922509	0.5981	0.0094	0.0768	0.0011	0.85983	0.05643	0.00048		475.6	6	476.8	6.5	469.327	18.8304		-1.59232
10/225_12	150.1		0.900576	0.648	0.011	0.083	0.0012	0.82335	0.05646	0.00054		507.3	6.8	514.1	7.4	470.503	21.1687		-9.26598
10/225_13	292.9		0.490918	0.597	0.01	0.0772	0.0011	0.92642	0.05622	0.00042		474.5	6.5	479.1	6.4	461.067	16.5618		-3.91109
10/225_14	717		0.501781	0.6269	0.0095	0.0781	0.0011	0.96443	0.05825	0.00031		494.6	6.1	484.6	6.3	539.178	11.6412		10.1224
10/225_15	106.7		0.595948	0.664	0.014	0.0862	0.0015	0.82892	0.0566	0.00061		519.5	8.6	532.9	9.1	475.982	23.8311		-11.958
10/225_16	60.6		1.00402	0.626	0.014	0.0804	0.0012	0.64698	0.0579	0.001		493	8.5	498.6	7.4	525.98	37.8643		5.20551
10/225_17	535		0.484496	0.617	0.01	0.07724	0.0009	0.8052	0.05785	0.00059		487.6	6.4	479.6	5.4	524.086	22.3665		8.48823
10/225_18	612.5		0.961816	0.6027	0.0094	0.0764	0.0012	0.9731	0.05744	0.00033		478.6	6	474.6	6.9	508.467	12.633		6.66055
10/225_19	64.8		0.943396	0.608	0.013	0.0767	0.0012	0.69375	0.05724	0.00094		481.8	8.3	477.2	7.3	500.792	36.1582		4.71091
10/225_20	79.4		0.858369	0.602	0.013	0.0768	0.0012	0.69259	0.05706	0.00091		477.7	8.2	477	7.4	493.853	35.1565		3.41254
10/225_21	177.4		0.62422	0.733	0.013	0.077	0.0012	0.81075	0.06939	0.0008		559.2	7.7	478.3	6.9	910.356	23.7393		47.4601
10/225_22	73.4		0.830565	0.595	0.014	0.0763	0.0012	0.70414	0.05719	0.00087		472.9	8.8	473.8	7	498.867	33.5059		5.02486
10/225_23	228		1.14155	0.614	0.013	0.0782	0.0013	0.89437	0.0573	0.00054		485.6	8.1	485.1	7.9	503.098	20.7418		3.57747
10/225_24	1026		0.560224	0.732	0.017	0.088	0.0016	0.95303	0.06024	0.00051		556.6	9.9	543.3	9.4	612.206	18.2925		11.2554
10/225_25	74.2		0.69735	0.627	0.013	0.0774	0.0012	0.63655	0.0598	0.001		494.7	8.2	480.4	7	596.346	36.2276		19.4427
10/225_26	421		0.710732	0.839	0.017	0.0804	0.0012	0.8784	0.07609	0.00098		617.9	9.2	499.6	7.6	1097.44	25.7752		54.4758
10/225_27	142.2		1.21065	0.688	0.015	0.0813	0.0016	0.85418	0.06172	0.00087		530.8	9.1	503.6	9.8	664.421	30.1934		24.2047
10/225_28	43.3		0.944287	0.618	0.016	0.0764	0.0012	0.57349	0.0586	0.0012		488	10	474.8	7.1	552.267	44.6943		14.0271
10/225_29	246		1.5361	1.392	0.053	0.0727	0.0019	0.25211	0.1431	0.006		883	23	452	11	2265.06	72.3128		80.0447
10/225_30	1754		0.495295	0.632	0.011	0.079	0.0013	0.98986	0.05817	0.00025		497	6.7	490.2	7.9	536.171	9.40581		8.57389
10/225_31	249.5		0.556174	0.6009	0.0098	0.077	0.001	0.91646	0.05687	0.00046		478.2	6.4	478.4	6.3	486.496	17.8533		1.66408
10/225_32	594		0.494071	0.659	0.013	0.084	0.0015	0.96682	0.057	0.00028		514.1	8	520	9.2	491.533	10.8331		-5.79142
10/225_33	1012		0.547945	0.765	0.032	0.0804	0.0012	0.68955	0.0684	0.0023		573	18	498.5	7.2	880.699	69.5602		43.3972
10/225_34	1540		0.340136	0.776	0.021	0.0794	0.0016	0.8839	0.0713	0.0012		583	12	492.5	9.3	966.027	34.3577		49.018
10/225_35	378.9		0.808604	0.6202	0.0098	0.07858	0.00098	0.92031	0.05741	0.0004		489.5	6.1	487.6	5.9	507.318	15.3238		3.88667
10/225_37	1160		0.520021	0.567	0.017	0.0726	0.0023	0.98995	0.05738	0.00025		458	11	451	14	862.446	55.0781		47.7069
10/225_36	54.5		0.78125	0.722	0.021	0.0777	0.0012	0.57599	0.0678	0.0018		552	12	482.3	7	506.168	9.58425		4.71545
10/225_38	283.5		1.06838	0.677	0.01	0.0778	0.001	0.83011	0.06274	0.00057		524.7	6.2	483.2	6	699.43	19.3485		30.9151
10/225_39	85.1		1.02145	0.611	0.013	0.0783	0.0012	0.68319	0.05654	0.00079		483.2	8.3	486.9	6.8	473.636	30.9085		-2.80039
10/225_40	94.7		0.763359	0.604	0.013	0.0765	0.0011	0.62782	0.05722	0.00094		478.9	8.2	474.9	6.5	500.022	36.1756		5.02425
10/225_41	948		0.506098	0.5995	0.0081	0.0764	0.001	0.98773	0.05704	0.00028		476.6	5.2	474.7	6.1	493.08	10.8226		3.7276
10/225_42	208		0.931099	0.669	0.017	0.0711	0.0016	0.70942	0.0656	0.0013		519	10	442.3	9.4	793.638	41.5648		44.2693
10/225_43	720		0.932836	0.914	0.029	0.0838	0.0017	0.84281	0.0793	0.0016		657	16	518	10	1179.63	39.893		56.088
10/225_44	1597		0.548095	0.6342	0.0094	0.0799	0.0012	0.9898	0.05751	0.00021		498.3	5.8	495.4	6.9	511.144	8.02574		3.08018
10/225_45	307.9		0.428816	0.689	0.013	0.0818	0.0012	0.65064	0.06042	0.00079		531.7	7.5	506.9	7	618.649	28.2206		18.0634
10/225_46	1175		0.442674	0.666	0.013	0.0801	0.0014	0.97108	0.06014	0.00042		516.2	8.3	496.9	8.3	608.615	15.0985		18.3557
10/225_47	321		0.536481	0.604	0.011	0.0782	0.0013	0.96321	0.0561	0.00036		480	7.1	485.4	7.8	456.328	14.2379		-6.37079
10/225_48	482		0.809717	0.749	0.019	0.081	0.0013	0.68186	0.0662	0.0011		568	11	502.1	7.7	812.706	34.7454		38.2187
10/225_49	216.7		0.732601	1.165	0.082	0.0912	0.0016	0.62206	0.0934	0.0057		769	37	562.7	9.5	1496.01	115.447		62.3866
10/225_50	1233		1.39587	6.94	0.36	0.1199	0.0029	0.91819	0.41	0.014		2089	50	732	17	3946.16	51.2212		81.4503
10/225_51	243.6		0.501002	0.6075	0.0088	0.078	0.00089	0.76624	0.05622	0.00054		481.7	5.6	484.1	5.3	461.067	21.2937		-4.99553
10/225_52	339.4		0.514668	0.5859	0.0064	0.07586	0.00076	0.8486	0.05604	0.00034		468	4.1	471.4	4.5	453.954	13.4668		-3.84322
10/225_53	469.6		1.29702	1.195	0.027	0.0942	0.0016	0.52376	0.0926	0.0017		797	12	580.1	9.3	1479.72	34.8049		60.7966
10/225_54	56.7		1.07677	0.595	0.012	0.07564	0.00067	0.57353	0.05674	0.00093		473.2	7.9	470	4	481.442	36.2089		2.37665
10/225_55	840		0.394633	0.6226	0.0078	0.07877	0.0008	0.89415	0.05711	0.00029		491.8	5	488.8	4.8	495.783	11.1902		1.40856
10/225_56	134.4		0.517866	0.614	0.011	0.07846	0.00094	0.73594	0.05648	0.00064		488	6.7	486.8	5.6	471.287	25.0765		-3.2916
10/225_57	98.6		1.06689	0.618	0.012	0.07593	0.00093	0.49759	0.05936	0.00095		488.1	7.5	471.8	5.6	580.325	34.7648		18.7007
10/225_58	342		0.609385	0.867	0.039	0.0791	0.0014	0.81667	0.0785	0.0025		634	21	490.7	8.3	1159.56	63.1529		57.6821
10/225_59	162		0.728863	0.6073	0.0095	0.07566	0.00084	0.63407	0.05775	0.0007		481.5	6	470.1	5	520.29	26.5997		9.64657
10/225_60	509		0.494071	0.602	0.0093	0.0771	0.0011	0.94111	0.05669	0.0003		478.1	5.9	478.7	6.8	479.494	11.6945		0.16565
10/225_61	60.6		0.926784	0.602	0.012	0.07543	0.00086	0.44915	0.0578	0.001		477.9	7.8	468.7	5.2	522.189	37.9544		10.2432
10/225_62	129.4		0.584454	0.6008	0.0092	0.07581	0.00087	0.62485	0.05715	0.00073		478.1	6	471	5.2	497.326	28.1413		5.29354
10/225_63	191		1.25707	0.627	0.011	0.07727	0.00087	0.77864	0.05873	0.00065		493.5	6.6	479.8	5.2	557.102	24.1361		13.8757
10/225_64	59.9		0.619579	0.611	0.013	0.07737	0.00088	0.52605	0.0575	0.0011		485.9	7.9	480.4	5.3	510.762	42.0496		5.94444
10/225_65	89.5		1.23885	1.278	0.038	0.06875	0.0008	0.52771	0.1357	0.0032		833	17	428.6	4.8	2173.03	41.0785		80.2764
10/225_66	177.8		0.811754	0.7	0.024	0.07607	0.00095	0.56718	0.0666	0.0017		534	12	472.6	5.7	825.29	53.268		42.7353
10/225_67	2330		0.667735	0.6065	0.0099	0.0751	0.0013	0.98075	0.05864	0.00027		480.9	6.3	466.7	7.5	553.756	10.0468		15.721
10/225_68	280.3		0.636943	0.5895	0.008	0.07568	0.00084	0.88596	0.05647	0.0004		471.7	5.3	470.3	5	470.895	15.6767		0.126407
10/225_69	73.9		0.768049	0.61	0.012	0.0772	0.001	0.71921	0.05714	0.00085		483.2	7.8	479.2	6.2	496.941	32.7751		3.56997
10/225_70	242.5		0.473261	0.5888	0.0087	0.07577	0.00087	0.81985	0.05651	0.00053		470.6	5.7	470.8	5.2	472.462	20.7513		0.351805
10/225_71	459		0.485909	0.679	0.012	0.0858	0.0015	0.9502	0.05736	0.00032		525.6	7.2	531.6	9.2	505.401	12.2737		-5.18377
10/225_72	162.8		0.59453	0.6061	0.0094	0.07568	0.00089	0.68733	0.05866	0.00067		480.7	5.9	470.2	5.3	554.5	24.9194		15.2029
10/225_73	514		0.788644	0.6234	0.0078	0.0751	0.00089	0.93426	0.0603	0.00036		491.7	4.9	466.7	5.4	614.357	12.8948		24.0344
10/225_74	163.8		0.382555	0.943	0.028	0.092	0.0019	0.18644	0.0738	0.002		674	15	567	11	1036	54.7363		45.2705
10/225_75	1948		0.533333	0.666	0.026	0.0677	0.001	0.56821	0.0728	0.0016		522	14	422.1	6.2	1008.39	44.5768		58.1412
10/225_76	1930		0.488043	0.704	0.014	0.0729	0.0011	0.84453	0.07001	0.0009		540.6	8.3	453.7	6.8	928.646	26.395		51.1439
10/225_77	239		0.398724	0.927	0.027	0.0813	0.001	0.52136	0.0835	0.0021		666	14	503.6	6.2	1280.93	49.0072		60.6848
10/225_78	627		0.725689	0.902	0.02	0.0823	0.0013	0.9223	0.07992	0.00078		653	11	509.5	7.5	1195.01	19.2539		57.3645
10/225_79	1179		0.78125	0.7175	0.0091	0.07448	0.00087	0.93809	0.07009	0.00051		548.8	5.4	463.1	5.2	930.991	14.9347		50.2573
10/225_80	581.6		0.537634	0.5963	0.0095	0.0764	0.0011	0.9146	0.05655	0.00035		474.5	6	474.5	6.4	474.028	13.6903		-0.0996749
10/225_81	32.21		0.810373	0.613	0.018	0.0764	0.0013	0.53004	0.0586	0.0014		484	11	474.8	7.8	552.267	52.1434		14.0271
10/225_82	119.3		0.896861	0.644	0.013	0.07802	0.00097	0.69793	0.05973	0.00083		504.9	8	484.2	5.8	593.808	30.117		18.4584
10/225_83	434		0.520833	0.628	0.011	0.0766	0.0012	0.91763	0.05944	0.00035		494.2	6.6	475.9	7.1	583.25	12.7846		18.4055
10/225_84	409		0.727273	0.635	0.012	0.0773	0.0012	0.86281	0.05991	0.00058		498.9	7.6	480	7.1	600.326	20.9594		20.0434
10/225_85	235.8		0.573493	0.627	0.01	0.0775	0.0011	0.82121	0.05841	0.00048		493.9	6.5	481.1	6.4	545.175	17.9575		11.7531
10/225_86	260.4		0.726216	0.607	0.012	0.0779	0.0013	0.89799	0.05672	0.00049		481.2	7.3	483.3	8	480.663	19.0871		-0.548553
10/225_87	578		0.724113	0.5964	0.0082	0.0766	0.001	0.91487	0.05688	0.00026		475.3	5.3	475.4	6.2	486.884	10.0886		2.35862
10/225_88	149.4		0.902527	0.5976	0.0096	0.0758	0.0011	0.79705	0.05721	0.00058		476.1	6	471.1	6.5	499.637	22.3265		5.71164
10/225_89	473		0.697301	0.703	0.01	0.0773	0.001	0.8672	0.06582	0.00052		540.2	6	480.1	6.1	800.657	16.5517		40.0367
10/225_90	400.3		0.802568	0.615	0.011	0.0773	0.0011	0.68205	0.05842	0.00065		485.9	7	480	6.4	545.549	24.3117		12.0152
10/225_91	360.6		0.45977	0.648	0.011	0.0792	0.0011	0.69239	0.05885	0.00055		506.7	6.7	492.3	7	561.551	20.3658		12.3322
10/225_92	1106		0.530504	0.792	0.019	0.0783	0.0012	0.65916	0.0732	0.0012		591	11	486.1	7.2	1019.49	33.1938		52.3195
10/225_93	484.2		0.88347	0.788	0.012	0.0777	0.0011	0.89908	0.07381	0.00044		589.3	7	482.6	6.5	1036.28	12.0399		53.4294
10/225_94	1001		0.566893	0.676	0.019	0.074	0.0014	0.88675	0.0662	0.00092		523	11	460.3	8.3	812.706	29.0597		43.362
10/225_95	655.4		0.0948767	0.753	0.032	0.0746	0.0012	0.53289	0.072	0.0024		567	18	463.6	7.2	985.941	67.84		52.9789
10/225_96	255.4		0.520021	0.6053	0.0094	0.0729	0.0011	0.68868	0.06036	0.0006		480.3	6	453.8	6.9	616.505	21.4623		26.3915
10/225_97	1835		0.494315	0.6039	0.0088	0.0773	0.0011	0.97298	0.05689	0.0002		479.4	5.6	480	6.8	487.272	7.75855		1.49233
10/225_98	96.1		0.998004	0.659	0.014	0.08	0.0011	0.7433	0.06024	0.00092		515.4	8.5	495.8	6.7	612.206	32.9982		19.0142
10/225_99	266		0.436681	0.63	0.011	0.079	0.0013	0.84176	0.05755	0.00056		495.5	6.8	489.8	7.7	512.672	21.3815		4.46135
10/225_100	222.7		0.415282	0.652	0.011	0.0822	0.0013	0.8922	0.05714	0.00045		509	6.7	509	7.6	496.941	17.3515		-2.42672
10/225_101	117.5		0.73046	0.681	0.017	0.077	0.001	0.59688	0.0638	0.0012		526	10	477.8	6.2	735.007	39.825		34.9938
10/225_102	58		1.05652	0.624	0.015	0.0766	0.0012	0.52004	0.0589	0.0011		491.8	9.2	476	7.3	563.402	40.6844		15.5132
10/225_103	562		0.714286	0.773	0.015	0.0743	0.0011	0.77098	0.07498	0.00073		580.6	8.5	461.8	6.7	1067.97	19.57		56.7589
10/225_104	378.7		0.876424	0.671	0.011	0.0822	0.0012	0.8734	0.0594	0.00047		520.9	6.8	508.9	7.2	581.788	17.1836		12.5283
10/225_105	939		0.436491	1.34	0.045	0.0819	0.0017	0.67437	0.1191	0.0024		860	19	509	10	1942.77	36.0366		73.8002
10/225_106	208		0.900009	0.5977	0.0082	0.07469	0.00096	0.82426	0.05807	0.00055		475.5	5.2	464.3	5.7	532.404	20.7417		12.7918
10/225_107	610		0.696864	0.993	0.044	0.0913	0.002	0.89301	0.0786	0.0021		698	22	563	12	1162.08	52.9613		51.5524
10/225_108	90.1		0.681199	1.212	0.077	0.0807	0.0016	0.77579	0.1081	0.005		796	32	500.2	9.7	1767.64	84.4868		71.7024
10/225_109	1506		0.926784	0.767	0.014	0.07608	0.00097	0.60928	0.0739	0.0012		578.4	8.2	472.7	5.8	1038.74	32.7838		54.4929
10/225_110	395		1.12233	0.729	0.016	0.0776	0.0011	0.58937	0.0682	0.0013		555.3	9.5	481.4	6.6	874.638	39.4695		44.9601
10/225-CA_1	93.6		1.3245	0.631	0.023	0.0799	0.0014	0.49199	0.0571	0.0022		495	14	495.4	8.4	480	87		-3.20833
10/225-CA_2	62.1		1.28866	0.637	0.03	0.0785	0.0014	0.22351	0.0585	0.0028		502	17	487.2	8.7	550	110		11.4182
10/225-CA_7	46.6		0.759878	0.61	0.032	0.0763	0.0016	0.42892	0.0576	0.0031		482	21	474	9.7	480	120		1.25
10/225-CA_8	42.3		0.582751	1.22	0.062	0.1247	0.0035	0.65586	0.0704	0.0026		810	28	757	20	935	72		19.0374
10/225-CA_9	51.6		1.01729	0.682	0.03	0.0808	0.002	0.41585	0.0592	0.003		526	18	501	12	599	96		16.3606
10/225-CA_10	79		1.31527	0.664	0.022	0.0804	0.0013	0.048689	0.0598	0.0025		519	13	498.5	7.7	565	95		11.7699
10/225-CA_11	90.4		1.19574	0.639	0.029	0.0801	0.0012	0.69385	0.0576	0.0023		500	18	496.8	7.1	509	82		2.39686
10/225-CA_12	59.3		0.798722	0.636	0.027	0.0797	0.0017	0.44232	0.0576	0.0027		498	17	494	10	490	100		-0.816327
10/225-CA_14	84		0.759301	0.639	0.022	0.0779	0.0013	0.17161	0.0604	0.0021		500	13	483.3	8	628	76		23.0414
10/225-CA_15	126		1.14679	0.617	0.027	0.0769	0.0017	0.80143	0.057	0.0018		482	14	477.5	9.9	513	78		6.92008
10/225-CA_17	65		0.724638	0.605	0.026	0.0781	0.0016	0.18638	0.056	0.0026		479	16	484.9	9.8	441	94		-9.95465
10/225-CA_18	111		0.613497	0.616	0.025	0.0776	0.0012	0.46275	0.0552	0.0027		486	16	481.7	7.3	400	110		-20.425
10/225-CA_20	200		0.633714	0.615	0.016	0.07719	0.00071	0.7392	0.0583	0.0012		483.4	8.2	479.3	4.3	533	45		10.075
10/225-CA_25	89		0.744048	0.608	0.033	0.0768	0.0018	0.53281	0.0557	0.0031		481	21	477	11	440	110		-8.40909
10/225-CA_26	141.3		0.858369	0.601	0.02	0.0776	0.0013	0.51336	0.0557	0.0018		479	12	481.9	7.6	424	73		-13.6557
10/225-CA_27	29.5		0.862069	0.595	0.046	0.0773	0.0024	0.1628	0.0561	0.0044		478	28	480	14	420	170		-14.2857
10/225-CA_28	46.7		0.829187	0.627	0.048	0.077	0.002	0.097533	0.0574	0.005		490	29	478	12	440	160		-8.63636
10/225-CA_29	44.9		0.93633	0.615	0.029	0.0782	0.0015	0.16671	0.0562	0.003		485	19	485.2	9.1	470	120		-3.23404
10/225-CA_31	52.1		0.808407	0.615	0.034	0.0784	0.0015	0.39982	0.0565	0.0031		484	21	486.8	9.1	430	110		-13.2093
10/225-CA_32	60		0.820345	0.604	0.028	0.0762	0.0016	0.30723	0.0582	0.0025		478	17	473.1	9.7	504	98		6.13095
10/225-CA_33	63.8		0.768049	0.617	0.044	0.0783	0.0045	0.89144	0.0606	0.0043		485	30	485	27	580	150		16.3793
10/225-CA_34	66.2		1.41443	0.6	0.045	0.0768	0.0021	0.77972	0.0554	0.0037		475	29	477	13	470	140		-1.48936
10/225-CA_35	76.3		0.927644	0.599	0.02	0.077	0.0014	0.35579	0.0554	0.0022		475	13	478	8.3	418	84		-14.3541
10/225-CA_36	53.5		1.38504	0.613	0.044	0.0772	0.0034	0.4335	0.0548	0.0038		483	28	479	20	400	160		-19.75
10/225-CA_37	57.5		0.888889	0.674	0.025	0.0808	0.0016	0.4368	0.0604	0.0023		524	15	500.9	9.8	597	83		16.0972
10/225-CA_39	101		0.967118	0.739	0.039	0.083	0.0017	0.14456	0.0653	0.0035		563	23	513.8	9.9	770	110		33.2727
10/225-CA_40	78.1		1.16306	0.62	0.028	0.0782	0.0016	0.4506	0.0571	0.0023		488	18	485.2	9.8	474	89		-2.36287
10/225-CA_41	124.8		0.333667	3.594	0.064	0.2646	0.0034	0.77096	0.0986	0.0016		1547	14	1513	17	1587	34		4.66289
10/225-CA_42	34.5		0.730994	0.608	0.033	0.0774	0.002	0.06494	0.0579	0.0035		480	21	480	12	500	130		4
10/225-CA_43	99		1.21212	0.652	0.023	0.0795	0.0018	0.74832	0.0593	0.0018		509	15	493	11	566	66		12.8975
10/225-CA_46	65.7		0.799361	0.602	0.03	0.0759	0.0015	0.73504	0.0574	0.003		478	19	471.6	9.3	510	110		7.52941
10/225-CA_47	187.6		1.2285	0.622	0.018	0.07501	0.00096	0.56111	0.0595	0.0017		491	11	466.3	5.7	586	57		20.4266
10/225-CA_48	68.6		1.07759	0.634	0.025	0.0768	0.0014	0.14172	0.0587	0.0024		497	16	477.2	8.3	542	94		11.9557
10/225-CA_49	58.3		0.830565	0.617	0.034	0.0772	0.002	0.35959	0.0581	0.0029		480	19	479	12	520	98		7.88462
